# Supplementary material
Source: PubMed Central journal article supplement (PMC8958181)
Supplement: NIHMS1755563-supplement-1755563_Sup_Fig_1.pdf [file NIHMS1755563-supplement-1755563_Sup_Fig_1.pdf]

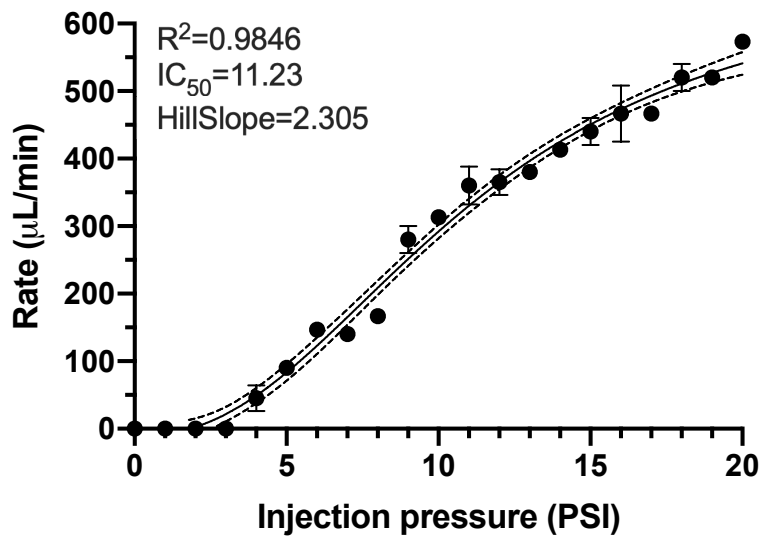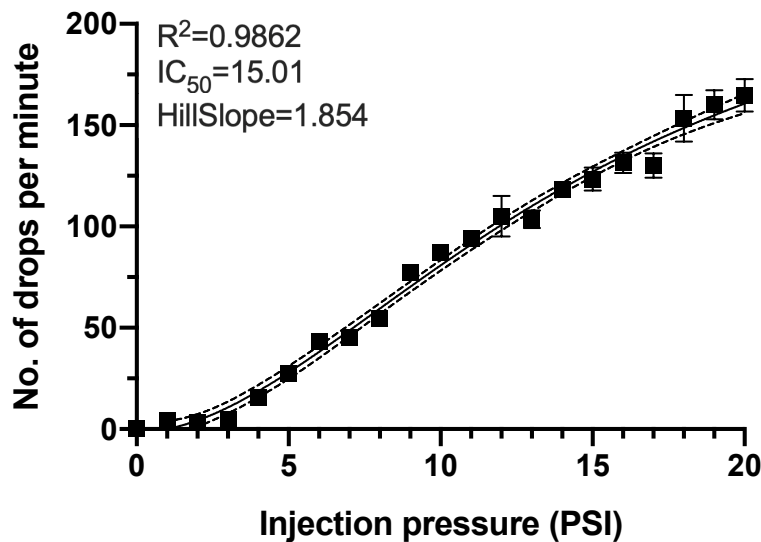

**Supplementary Figure 1.** Simulated injection pressure and corresponding volume injected over time. **(A)** The rate of volume delivered for each injection pressure ranging from psi of 1 to 20. **(B)** The number of drops per minute for each injection pressure of the same range. Best-fit sigmoidal curves (solid) with 95% confidence intervals (dotted) and goodness of fit ( $R^2$ ) are included.
